# Supplementary material for: Gender differences in injuries attributed to workplace violence in Ontario 2002–2015
Source: PubMed Central journal article supplement — Occup Environ Med. 2018 Aug 29;76(1):3–9. doi: 10.1136/oemed-2018-105152 (PMC6327871; doi:10.1136/oemed-2018-105152), 2018-08-29
Supplement: oemed-2018-105152supp001.pdf [file oemed-2018-105152supp001.pdf]

Appendix. WSIB Non-violence injury rates and Hospital emergency visits due to non work-related Assaults in Ontario

| <b>Workplace Non-violence injuries (WSIB)</b>                                            |                                     |                    |                                |                    |
|------------------------------------------------------------------------------------------|-------------------------------------|--------------------|--------------------------------|--------------------|
| <b>YEAR</b>                                                                              | <b>Incidence rate per 1000 FTES</b> |                    | <b>Rate Ratio<br/>(RR=F/M)</b> | <b>Pr &gt;  Z </b> |
|                                                                                          | <b>Male</b>                         | <b>Female</b>      |                                |                    |
| 2002                                                                                     | 27.6 (27.4, 27.9)                   | 18.6 (18.3, 18.8)  | 0.67                           | <.0001             |
| 2003                                                                                     | 26.0 (25.7, 26.2)                   | 17.7 (17.4, 17.9)  | 0.68                           | <.0001             |
| 2004                                                                                     | 24.8 (24.6, 25.0)                   | 17.1 (16.8, 17.3)  | 0.69                           | <.0001             |
| 2005                                                                                     | 24.1 (23.8, 24.3)                   | 17.1 (16.9, 17.3)  | 0.71                           | <.0001             |
| 2006                                                                                     | 22.2 (22.0, 22.4)                   | 16.2 (16.0, 16.4)  | 0.73                           | <.0001             |
| 2007                                                                                     | 21.4 (21.2, 21.6)                   | 15.7 (15.5, 15.9)  | 0.73                           | <.0001             |
| 2008                                                                                     | 20.0 (19.8, 20.1)                   | 14.8 (14.6, 15.0)  | 0.74                           | <.0001             |
| 2009                                                                                     | 17.1 (16.9, 17.3)                   | 13.2 (13.0, 13.3)  | 0.77                           | <.0001             |
| 2010                                                                                     | 14.7 (14.6, 14.9)                   | 11.3 (11.1, 11.5)  | 0.77                           | <.0001             |
| 2011                                                                                     | 13.5 (13.3, 13.6)                   | 10.1 (9.94, 10.3)  | 0.75                           | <.0001             |
| 2012                                                                                     | 13.6 (13.5, 13.8)                   | 10.0 (9.87, 10.2)  | 0.74                           | <.0001             |
| 2013                                                                                     | 13.4 (13.2, 13.5)                   | 9.89 (9.74, 10.0)  | 0.74                           | <.0001             |
| 2014                                                                                     | 13.2 (13.0, 13.4)                   | 9.65 (9.50, 9.80)  | 0.73                           | <.0001             |
| 2015                                                                                     | 12.2 (12.0, 12.3)                   | 9.19 (9.04, 9.34)  | 0.76                           | <.0001             |
| Average APC                                                                              | -6.67 <sup>1</sup>                  | -5.88 <sup>1</sup> |                                |                    |
| <b>Non work-related Assaults (Hospital Emergency)</b>                                    |                                     |                    |                                |                    |
| <b>YEAR</b>                                                                              | <b>Male</b>                         | <b>Female</b>      | <b>Rate Ratio<br/>(RR=F/M)</b> | <b>Pr &gt;  Z </b> |
| 2004                                                                                     | 8.19 (8.08, 8.30)                   | 3.21 (3.13, 3.28)  | 0.39                           | <.0001             |
| 2005                                                                                     | 8.69 (8.58, 8.80)                   | 3.28 (3.20, 3.35)  | 0.38                           | <.0001             |
| 2006                                                                                     | 8.97 (8.85, 9.08)                   | 3.39 (3.32, 3.46)  | 0.38                           | <.0001             |
| 2007                                                                                     | 8.73 (8.62, 8.84)                   | 3.29 (3.22, 3.36)  | 0.38                           | <.0001             |
| 2008                                                                                     | 8.53 (8.42, 8.64)                   | 3.30 (3.23, 3.37)  | 0.39                           | <.0001             |
| 2009                                                                                     | 9.24 (9.12, 9.36)                   | 3.29 (3.22, 3.37)  | 0.36                           | <.0001             |
| 2010                                                                                     | 8.76 (8.65, 8.88)                   | 3.51 (3.43, 3.58)  | 0.40                           | <.0001             |
| 2011                                                                                     | 8.15 (8.05, 8.26)                   | 3.33 (3.25, 3.40)  | 0.41                           | <.0001             |
| 2012                                                                                     | 7.85 (7.75, 7.96)                   | 3.27 (3.19, 3.34)  | 0.42                           | <.0001             |
| 2013                                                                                     | 6.84 (6.74, 6.94)                   | 3.06 (2.99, 3.13)  | 0.45                           | <.0001             |
| 2014                                                                                     | 6.54 (6.44, 6.63)                   | 3.14 (3.06, 3.21)  | 0.48                           | <.0001             |
| Average APC                                                                              | -2.16 <sup>1</sup>                  | -0.37              |                                |                    |
| 1. The Annual Percentage Change (APC) is significantly different from zero at alpha=0.05 |                                     |                    |                                |                    |
